# Supplementary material for: Absence of 4-Formylaminooxyvinylglycine Production by Pseudomonas fluorescens WH6 Results in Resource Reallocation from Secondary Metabolite Production to Rhizocompetence
Source: MDPI journal article supplement (doi:10.3390/microorganisms9040717), 2021-03-31
Supplement: s1 [file s1]

A. Amino acid comparison of MocR TFs in WH6

| Amino Acid Percent Identity |    |     |       |       |       |       |       |       |       |       |       |       |       |       |
|-----------------------------|----|-----|-------|-------|-------|-------|-------|-------|-------|-------|-------|-------|-------|-------|
| WH6 locus                   |    | 1   | 2     | 3     | 4     | 5     | 6     | 7     | 8     | 9     | 10    | 11    | 12    | 13    |
| GvgR                        | 1  |     | 63.92 | 35.80 | 36.81 | 21.83 | 20.75 | 24.51 | 21.34 | 20.15 | 17.51 | 19.31 | 18.43 | 16.18 |
| RS27900                     | 2  | 175 |       | 39.29 | 39.50 | 22.27 | 21.78 | 25.60 | 23.82 | 21.90 | 17.01 | 17.50 | 18.22 | 16.12 |
| RS12370                     | 3  | 312 | 289   |       | 39.92 | 23.65 | 22.55 | 21.04 | 19.66 | 19.61 | 16.60 | 19.81 | 19.96 | 15.29 |
| RS21500                     | 4  | 309 | 291   | 289   |       | 22.42 | 23.32 | 20.75 | 19.77 | 20.81 | 17.70 | 20.31 | 18.15 | 15.77 |
| RS08645                     | 5  | 394 | 391   | 381   | 391   |       | 32.51 | 20.19 | 19.52 | 16.38 | 16.76 | 17.97 | 19.61 | 15.66 |
| RS12515                     | 6  | 401 | 395   | 388   | 388   | 328   |       | 18.52 | 18.44 | 17.56 | 18.80 | 19.06 | 19.13 | 15.61 |
| RS15445                     | 7  | 388 | 375   | 394   | 401   | 411   | 418   |       | 35.70 | 29.07 | 17.46 | 17.59 | 15.99 | 14.66 |
| RS28335                     | 8  | 424 | 403   | 421   | 426   | 433   | 438   | 335   |       | 34.98 | 16.76 | 18.68 | 15.78 | 15.17 |
| RS19630                     | 9  | 420 | 403   | 410   | 411   | 439   | 432   | 366   | 342   |       | 17.01 | 14.53 | 13.99 | 14.26 |
| RS21270                     | 10 | 438 | 439   | 437   | 437   | 432   | 419   | 435   | 452   | 444   |       | 35.61 | 19.96 | 19.57 |
| RS21540                     | 11 | 422 | 429   | 413   | 416   | 420   | 412   | 431   | 444   | 459   | 311   |       | 20.93 | 18.77 |
| RS13985                     | 12 | 425 | 422   | 409   | 424   | 410   | 410   | 436   | 459   | 461   | 405   | 389   |       | 13.18 |
| RS15350                     | 13 | 435 | 432   | 432   | 438   | 431   | 438   | 454   | 464   | 457   | 415   | 411   | 448   |       |
| Amino Acid Differences      |    |     |       |       |       |       |       |       |       |       |       |       |       |       |

B. Protein alignment of GvgR and RS27900

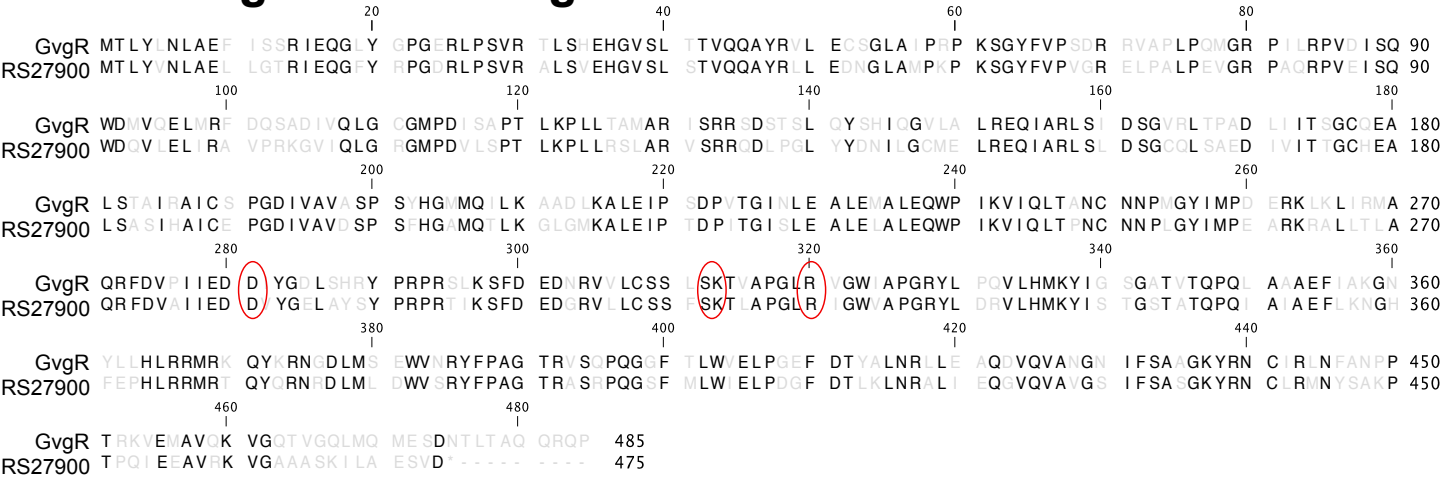

C. Mapping of reads from WT and  $\Delta gvgR$  strains to the RS27900 regulon

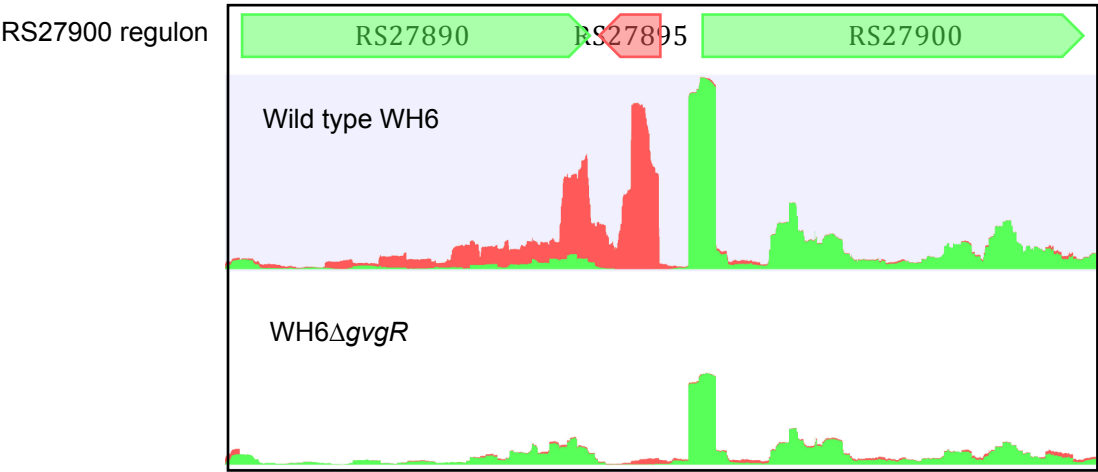

Supplemental Figure 1. Comparison of GvgR and the MocR RS27900. (A) Amino acid comparison between MocR's in WH6. (B) Protein alignment of the two most similar MocR's GvgR and RS27900. Black residues are identical. Amino acids circled in red are conserved PLP-binding residues. (C) Mapping of sequencing reads from wild type WH6 and  $\Delta gvgR$  strains to the RS27900 regulon. Arrowheads on the genes point to direction of transcription. Green = reads map to sense strand and red = reads map to anti-sense strand. From CLC Genomics Workbench.
