# Supplementary material for: Absence of 4-Formylaminooxyvinylglycine Production by Pseudomonas fluorescens WH6 Results in Resource Reallocation from Secondary Metabolite Production to Rhizocompetence
Source: MDPI journal article supplement (doi:10.3390/microorganisms9040717), 2021-03-31
Supplement: s1 [file s1]

A. Increased expression of genes involved in denitrification in *gvg* operon mutants

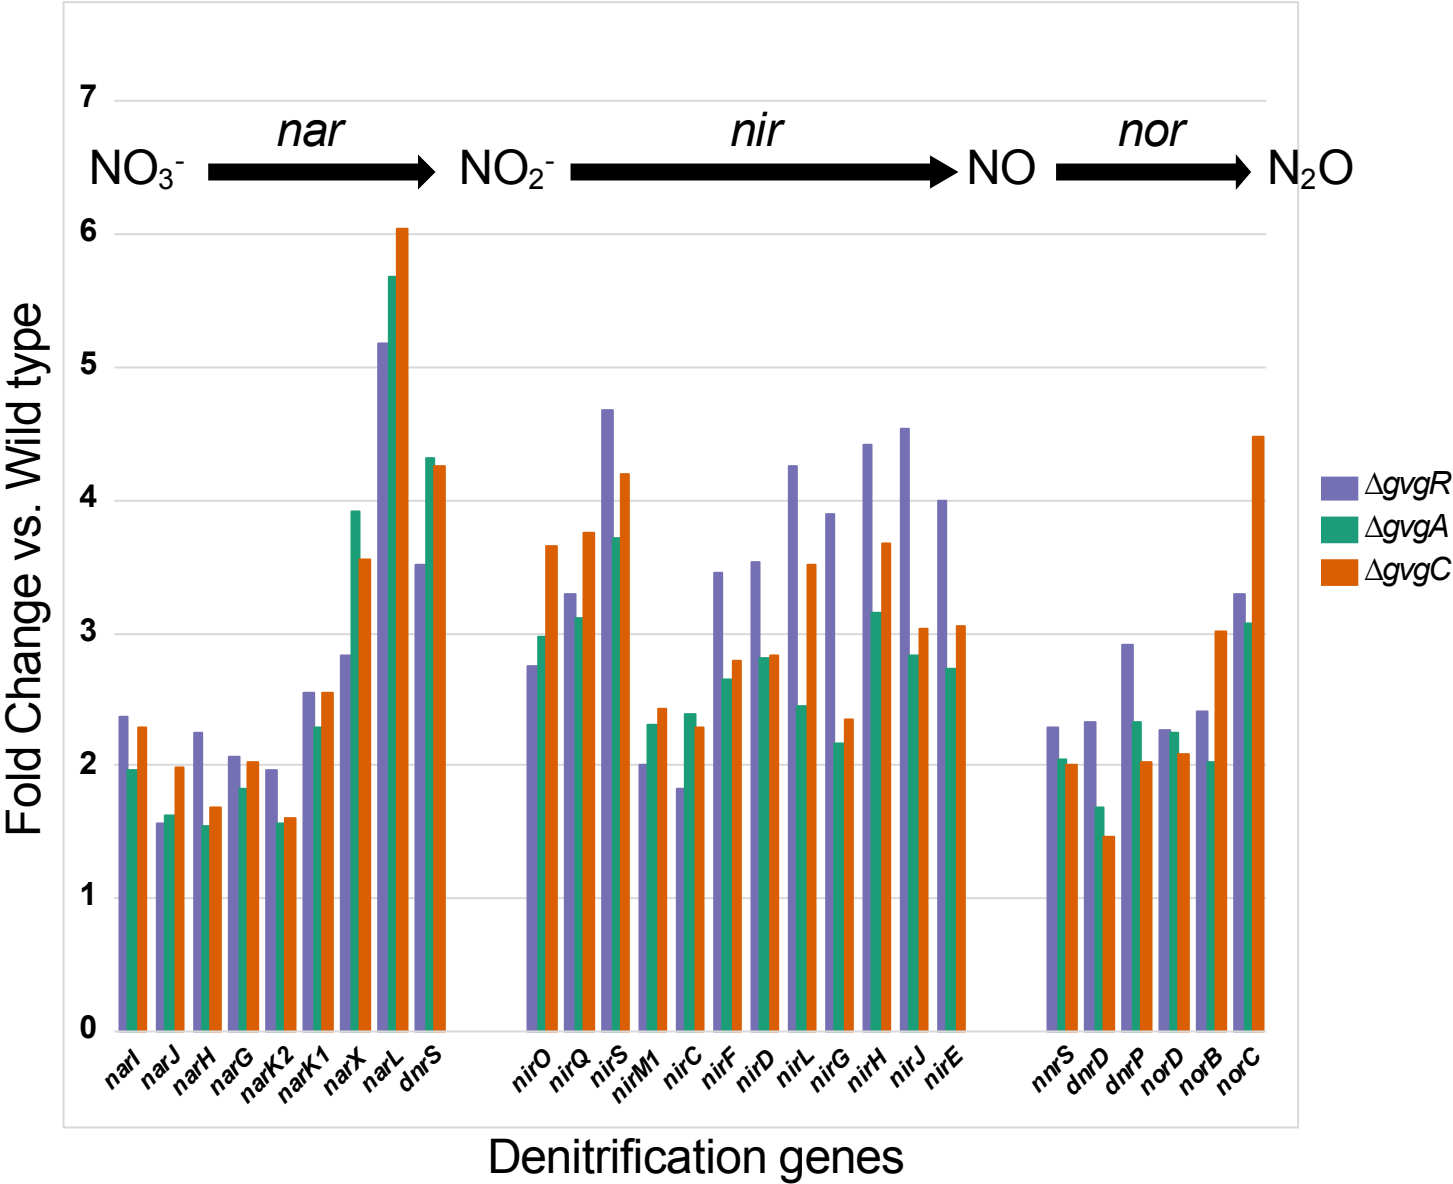

Supplemental Figure 2. Plotting of fold change expression of denitrification genes in  $\Delta gvgR$ ,  $\Delta gvgA$ , and  $\Delta gvgC$  strains compared to WT. Schematic above the bar chart displays the steps of denitrification pathway encoded in the WH6 genome.
